# Supplementary material
Source: HighWire-hosted journal article supplement (https://bjsm.bmj.com/content/54/6/332)
Supplement: inline-supplementary-material-6 [file inline-supplementary-material-6.docx]

|  | Activity | Hedges g | SE | Variance | Moderator | Moderator | Moderator |
| --- | --- | --- | --- | --- | --- | --- | --- |
| Alsubheen, 2016 | AMBULATION | -1.26 | 0.32 | 0.10 | GVF | ACC | Commercial |
| Bai, 2017 | AMBULATION MODERATE | -0.12 | 0.15 | 0.02 | AW | ACC + HR | Commercial |
| Bai, 2017 | RUN MODERATE | -0.28 | 0.13 | 0.02 | AW | ACC + HR | Commercial |
| Bai, 2017 | SEDENTARY | -0.38 | 0.17 | 0.03 | AW | ACC + HR | Commercial |
| Bai, 2017 | AMBULATION MODERATE | 0.72 | 0.13 | 0.02 | FCHR | ACC + HR | Commercial |
| Bai, 2017 | RUN MODERATE | 0.37 | 0.13 | 0.02 | FCHR | ACC + HR | Commercial |
| Bai, 2017 | SEDENTARY | -0.56 | 0.18 | 0.03 | FCHR | ACC + HR | Commercial |
| Benito, 2012 | AEE LIGHT | -0.75 | 0.15 | 0.02 | SWA p2 | ACC + HS | Research |
| Benito, 2012 | AEE MODERATE | -0.83 | 0.15 | 0.02 | SWA p2 | ACC + HS | Research |
| Benito, 2012 | AEE VIGOROUS | -0.75 | 0.15 | 0.02 | SWA p2 | ACC + HS | Research |
| Berntsen, 2010 | AEE MODERATE | 0.27 | 0.16 | 0.03 | SWA p2 | ACC + HS | Research |
| Berntsen, 2010 | AEE VERY VIGOROUS | -2.22 | 0.30 | 0.09 | SWA p2 | ACC + HS | Research |
| Berntsen, 2010 | AEE VIGOROUS | -1.52 | 0.24 | 0.06 | SWA p2 | ACC + HS | Research |
| Berntsen, 2011 | AEE LIGHT | -0.35 | 0.16 | 0.03 | SWA p2 | ACC + HS | Research |
| Berntsen, 2011 | AEE MODERATE | -0.48 | 0.24 | 0.06 | SWA p2 | ACC + HS | Research |
| Bhammar, 2016 | AEE | 0.53 | 0.13 | 0.02 | SWAM | ACC + HS | Research |
| Bhammar, 2016 | AEE 2 | 0.66 | 0.14 | 0.02 | SWAM | ACC + HS | Research |
| Bhammar, 2016 | AMBULATION MODERATE | 0.57 | 0.14 | 0.02 | SWAM | ACC + HS | Research |
| Bhammar, 2016 | AMBULATION MODERATE 2 | 0.78 | 0.14 | 0.02 | SWAM | ACC + HS | Research |
| Bhammar, 2016 | AMBULATION VIGOROUS | 0.31 | 0.13 | 0.02 | SWAM | ACC + HS | Research |
| Bhammar, 2016 | AMBULATION VIGOROUS 2 | 0.58 | 0.14 | 0.02 | SWAM | ACC + HS | Research |
| Bhammar, 2016 | BIKE LIGHT | -0.68 | 0.15 | 0.02 | SWAM | ACC + HS | Research |
| Bhammar, 2016 | BIKE LIGHT 2 | 0.06 | 0.14 | 0.02 | SWAM | ACC + HS | Research |
| Bhammar, 2016 | HOUSEHOLD | 0.78 | 0.13 | 0.02 | SWAM | ACC + HS | Research |
| Bhammar, 2016 | HOUSEHOLD 2 | 1.22 | 0.15 | 0.02 | SWAM | ACC + HS | Research |
| Bhammar, 2016 | RUN MODERATE | 0.82 | 0.14 | 0.02 | SWAM | ACC + HS | Research |
| Bhammar, 2016 | RUN MODERATE 2 | 0.51 | 0.13 | 0.02 | SWAM | ACC + HS | Research |
| Bhammar, 2016 | SEDENTARY | 0.65 | 0.13 | 0.02 | SWAM | ACC + HS | Research |
| Bhammar, 2016 | SEDENTARY 2 | 0.00 | 0.11 | 0.01 | SWAM | ACC + HS | Research |
| Bhammar, 2016 | SWEEP | 0.65 | 0.13 | 0.02 | SWAM | ACC + HS | Research |
| Bhammar, 2016 | SWEEP 2 | 1.10 | 0.15 | 0.02 | SWAM | ACC + HS | Research |
| Boudreaux, 2018 | AEE | 1.46 | 0.26 | 0.07 | AWS2 | ACC + HR | Commercial |
| Boudreaux, 2018 | BIKE | 1.70 | 0.27 | 0.07 | AWS2 | ACC + HR | Commercial |
| Boudreaux, 2018 | AEE | -0.12 | 0.18 | 0.03 | FB | ACC + HR | Commercial |
| Boudreaux, 2018 | BIKE | -0.91 | 0.18 | 0.03 | FB | ACC + HR | Commercial |
| Boudreaux, 2018 | AEE | -0.20 | 0.19 | 0.04 | FC2 | ACC + HR | Commercial |
| Boudreaux, 2018 | BIKE | -1.05 | 0.22 | 0.05 | FC2 | ACC + HR | Commercial |
| Boudreaux, 2018 | AEE | 0.65 | 0.20 | 0.04 | GVHR | ACC + HR | Commercial |
| Boudreaux, 2018 | BIKE | 0.15 | 0.15 | 0.02 | GVHR | ACC + HR | Commercial |
| Boudreaux, 2018 | AEE | 1.01 | 0.23 | 0.05 | PA360 | ACC + HR | Commercial |
| Boudreaux, 2018 | BIKE | 0.60 | 0.18 | 0.03 | PA360 | ACC + HR | Commercial |
| Boudreaux, 2018 | AEE | 0.57 | 0.19 | 0.04 | TT | ACC + HR | Commercial |
| Boudreaux, 2018 | BIKE | 0.76 | 0.19 | 0.04 | TT | ACC + HR | Commercial |
| Brazeau, 2011 | BIKE LIGHT | -0.30 | 0.15 | 0.02 | SWA p3 | ACC + HS | Research |
| Brazeau, 2014 | AMBULATION MODERATE B | 1.30 | 0.22 | 0.05 | SWA p3 | ACC + HS | Research |
| Brazeau, 2014 | AMBULATION MODERATE C | 0.50 | 0.18 | 0.03 | SWA p3 | ACC + HS | Research |
| Brazeau, 2014 | BIKE LIGHT B | -0.09 | 0.18 | 0.03 | SWA p3 | ACC + HS | Research |
| Brazeau, 2014 | BIKE LIGHT C | -0.88 | 0.22 | 0.05 | SWA p3 | ACC + HS | Research |
| Brazeau, 2014 | SEDENTARY B | 2.16 | 0.27 | 0.07 | SWA p3 | ACC + HS | Research |
| Brazeau, 2014 | SEDENTARY C | 0.85 | 0.18 | 0.03 | SWA p3 | ACC + HS | Research |
| Brazeau, 2016 | AMBULATION LIGHT | 1.09 | 0.21 | 0.04 | SWA p3 | ACC + HS | Research |
| Brazeau, 2016 | AMBULATION MODERATE | 1.09 | 0.21 | 0.04 | SWA p3 | ACC + HS | Research |
| Brazeau, 2016 | AMBULATION VIGOROUS | 0.56 | 0.17 | 0.03 | SWA p3 | ACC + HS | Research |
| Brazeau, 2016 | BIKE | -0.83 | 0.21 | 0.04 | SWA p3 | ACC + HS | Research |
| Brazeau, 2016 | SEDENTARY | 0.81 | 0.17 | 0.03 | SWA p3 | ACC + HS | Research |
| Brazeau, 2016 | TEE | 0.18 | 0.15 | 0.02 | SWA p3 | ACC + HS | Research |
| Brugniaux, 2010 | AMBULATION VIGOROUS | -0.69 | 0.15 | 0.02 | Polar AW200 | ACC | Commercial |
| Calabro, 2014 | AEE | 0.14 | 0.11 | 0.01 | SWA p3 | ACC + HS | Research |
| Calabro, 2014 | AEE | 0.03 | 0.11 | 0.01 | SWAM | ACC + HS | Research |
| Calabro, 2015 | TEE | -0.04 | 0.12 | 0.02 | SWAM | ACC + HS | Research |
| Casiraghi, 2013 | BIKE LIGHT | -0.19 | 0.19 | 0.04 | SWA | ACC + HS | Research |
| Choudhry, 2017 | AMBULATION | 0.33 | 0.17 | 0.03 | AW | ACC + HR | Commercial |
| Choudhry, 2017 | AMBULATION VIGOROUS | -0.05 | 0.17 | 0.03 | AW | ACC + HR | Commercial |
| Choudhry, 2017 | BIKE | -0.09 | 0.15 | 0.02 | AW | ACC + HR | Commercial |
| Choudhry, 2017 | COMPUTER | 1.25 | 0.25 | 0.06 | AW | ACC + HR | Commercial |
| Choudhry, 2017 | HOUSEHOLD | -1.32 | 0.26 | 0.07 | AW | ACC + HR | Commercial |
| Choudhry, 2017 | RUN | 0.59 | 0.16 | 0.03 | AW | ACC + HR | Commercial |
| Choudhry, 2017 | STAIRS | -1.00 | 0.21 | 0.04 | AW | ACC + HR | Commercial |
| Choudhry, 2017 | SWEEP | -1.14 | 0.24 | 0.06 | AW | ACC + HR | Commercial |
| Choudhry, 2017 | AMBULATION | 0.34 | 0.14 | 0.02 | BMC | ACC + HS | Research |
| Choudhry, 2017 | AMBULATION VIGOROUS | 0.52 | 0.14 | 0.02 | BMC | ACC + HS | Research |
| Choudhry, 2017 | BIKE | -0.53 | 0.16 | 0.02 | BMC | ACC + HS | Research |
| Choudhry, 2017 | COMPUTER | 0.55 | 0.13 | 0.02 | BMC | ACC + HS | Research |
| Choudhry, 2017 | HOUSEHOLD | 0.75 | 0.14 | 0.02 | BMC | ACC + HS | Research |
| Choudhry, 2017 | RUN | 0.33 | 0.13 | 0.02 | BMC | ACC + HS | Research |
| Choudhry, 2017 | STAIRS | -1.01 | 0.17 | 0.03 | BMC | ACC + HS | Research |
| Choudhry, 2017 | SWEEP | 0.93 | 0.15 | 0.02 | BMC | ACC + HS | Research |
| Choudhry, 2017 | AMBULATION | 1.78 | 0.21 | 0.04 | FCHR | ACC + HR | Commercial |
| Choudhry, 2017 | AMBULATION VIGOROUS | 1.60 | 0.19 | 0.04 | FCHR | ACC + HR | Commercial |
| Choudhry, 2017 | BIKE | -2.15 | 0.35 | 0.12 | FCHR | ACC + HR | Commercial |
| Choudhry, 2017 | COMPUTER | -0.24 | 0.20 | 0.04 | FCHR | ACC + HR | Commercial |
| Choudhry, 2017 | HOUSEHOLD | -0.29 | 0.20 | 0.04 | FCHR | ACC + HR | Commercial |
| Choudhry, 2017 | RUN | 0.92 | 0.17 | 0.03 | FCHR | ACC + HR | Commercial |
| Choudhry, 2017 | STAIRS | -0.01 | 0.13 | 0.02 | FCHR | ACC + HR | Commercial |
| Choudhry, 2017 | SWEEP | 0.89 | 0.23 | 0.05 | FCHR | ACC + HR | Commercial |
| Choudhry, 2017 | AMBULATION | 0.91 | 0.17 | 0.03 | JU24 | ACC | Commercial |
| Choudhry, 2017 | AMBULATION VIGOROUS | 0.21 | 0.14 | 0.02 | JU24 | ACC | Commercial |
| Choudhry, 2017 | BIKE | -3.67 | 0.40 | 0.16 | JU24 | ACC | Commercial |
| Choudhry, 2017 | COMPUTER | -0.05 | 0.14 | 0.02 | JU24 | ACC | Commercial |
| Choudhry, 2017 | HOUSEHOLD | -1.72 | 0.22 | 0.05 | JU24 | ACC | Commercial |
| Choudhry, 2017 | RUN | 0.92 | 0.17 | 0.03 | JU24 | ACC | Commercial |
| Choudhry, 2017 | STAIRS | -1.39 | 0.20 | 0.04 | JU24 | ACC | Commercial |
| Choudhry, 2017 | SWEEP | -1.05 | 0.18 | 0.03 | JU24 | ACC | Commercial |
| Choudhry, 2017 | AMBULATION | -1.50 | 0.25 | 0.06 | MB | ACC + HR + HS | Commercial |
| Choudhry, 2017 | AMBULATION VIGOROUS | -2.15 | 0.31 | 0.10 | MB | ACC + HR + HS | Commercial |
| Choudhry, 2017 | BIKE | -0.90 | 0.22 | 0.05 | MB | ACC + HR + HS | Commercial |
| Choudhry, 2017 | COMPUTER | 0.13 | 0.19 | 0.04 | MB | ACC + HR + HS | Commercial |
| Choudhry, 2017 | HOUSEHOLD | -2.13 | 0.35 | 0.12 | MB | ACC + HR + HS | Commercial |
| Choudhry, 2017 | RUN | 0.17 | 0.17 | 0.03 | MB | ACC + HR + HS | Commercial |
| Choudhry, 2017 | STAIRS | -3.42 | 0.50 | 0.25 | MB | ACC + HR + HS | Commercial |
| Choudhry, 2017 | SWEEP | -2.01 | 0.33 | 0.11 | MB | ACC + HR + HS | Commercial |
| Colbert, 2011 | TEE | -1.10 | 0.11 | 0.01 | SWA p3 | ACC + HS | Research |
| Correa, 2016 | AEE | 0.56 | 0.11 | 0.01 | ACT | ACC | Research |
| Correa, 2016 | AEE | -0.43 | 0.11 | 0.01 | SWA | ACC + HS | Research |
| Diaz, 2015 | AMBULATION LIGHT L | -0.08 | 0.13 | 0.02 | FF | ACC | Commercial |
| Diaz, 2015 | AMBULATION LIGHT R | -0.15 | 0.13 | 0.02 | FF | ACC | Commercial |
| Diaz, 2015 | AMBULATION MODERATE L | 0.95 | 0.16 | 0.02 | FF | ACC | Commercial |
| Diaz, 2015 | AMBULATION MODERATE R | 0.96 | 0.16 | 0.02 | FF | ACC | Commercial |
| Diaz, 2015 | AMBULATION VIGOROUS L | 1.44 | 0.19 | 0.03 | FF | ACC | Commercial |
| Diaz, 2015 | AMBULATION VIGOROUS R | 0.94 | 0.15 | 0.02 | FF | ACC | Commercial |
| Diaz, 2015 | RUN L | 0.57 | 0.14 | 0.02 | FF | ACC | Commercial |
| Diaz, 2015 | RUN R | 0.27 | 0.13 | 0.02 | FF | ACC | Commercial |
| Diaz, 2016 | AMBULATION LIGHT | 1.36 | 0.24 | 0.06 | FF | ACC | Commercial |
| Diaz, 2016 | AMBULATION MODERATE | 3.04 | 0.41 | 0.17 | FF | ACC | Commercial |
| Diaz, 2016 | AMBULATION VIGOROUS | 1.07 | 0.21 | 0.04 | FF | ACC | Commercial |
| Diaz, 2016 | RUN | 0.78 | 0.19 | 0.04 | FF | ACC | Commercial |
| Dondzilla, 2016 | AMBULATION LIGHT | 0.84 | 0.21 | 0.04 | FC | ACC | Commercial |
| Dondzilla, 2016 | AMBULATION MODERATE | -0.52 | 0.19 | 0.04 | FC | ACC | Commercial |
| Dondzilla, 2016 | RUN LIGHT | -0.51 | 0.19 | 0.04 | FC | ACC | Commercial |
| Dondzilla, 2016 | RUN MODERATE | -1.13 | 0.24 | 0.06 | FC | ACC | Commercial |
| Dooley, 2017 | AMBULATION LIGHT | 0.49 | 0.13 | 0.02 | AW | ACC + HR | Commercial |
| Dooley, 2017 | AMBULATION MODERATE | 0.29 | 0.12 | 0.02 | AW | ACC + HR | Commercial |
| Dooley, 2017 | AMBULATION VIGOROUS | 0.27 | 0.12 | 0.01 | AW | ACC + HR | Commercial |
| Dooley, 2017 | SEDENTARY | 1.48 | 0.19 | 0.04 | AW | ACC + HR | Commercial |
| Dooley, 2017 | STAND | 1.80 | 0.21 | 0.05 | AW | ACC + HR | Commercial |
| Dooley, 2017 | AMBULATION LIGHT | 1.60 | 0.13 | 0.02 | FCHR | ACC + HR | Commercial |
| Dooley, 2017 | AMBULATION MODERATE | 1.13 | 0.11 | 0.01 | FCHR | ACC + HR | Commercial |
| Dooley, 2017 | AMBULATION VIGOROUS | 0.08 | 0.09 | 0.01 | FCHR | ACC + HR | Commercial |
| Dooley, 2017 | SEDENTARY | 0.28 | 0.14 | 0.02 | FCHR | ACC + HR | Commercial |
| Dooley, 2017 | STAND | -0.39 | 0.14 | 0.02 | FCHR | ACC + HR | Commercial |
| Dooley, 2017 | AMBULATION LIGHT | 0.72 | 0.10 | 0.01 | GF225 | ACC + HR | Commercial |
| Dooley, 2017 | AMBULATION MODERATE | 1.27 | 0.12 | 0.01 | GF225 | ACC + HR | Commercial |
| Dooley, 2017 | AMBULATION VIGOROUS | 0.63 | 0.10 | 0.01 | GF225 | ACC + HR | Commercial |
| Dooley, 2017 | SEDENTARY | 1.45 | 0.20 | 0.04 | GF225 | ACC + HR | Commercial |
| Dooley, 2017 | STAND | 1.14 | 0.18 | 0.03 | GF225 | ACC + HR | Commercial |
| Drenowatz, 2011 | RUN | -2.21 | 0.30 | 0.09 | SWA | ACC + HS | Research |
| Drenowatz, 2011 | RUN LIGHT | -1.10 | 0.20 | 0.04 | SWA | ACC + HS | Research |
| Drenowatz, 2011 | RUN MODERATE | -1.95 | 0.28 | 0.08 | SWA | ACC + HS | Research |
| Drenowatz, 2011 | RUN VIGOROUS | -2.41 | 0.32 | 0.10 | SWA | ACC + HS | Research |
| Erdogan, 2010 | AEE | 0.08 | 0.11 | 0.01 | SWA | ACC + HS | Research |
| Erdogan, 2010 | AEE VIGOROUS | -0.01 | 0.11 | 0.01 | SWA | ACC + HS | Research |
| Fruin, 2004 | AMBULATION MODERATE | 0.23 | 0.16 | 0.03 | SWA | ACC + HS | Research |
| Fruin, 2004 | AMBULATION UPHILL VIGOROUS | -0.21 | 0.16 | 0.03 | SWA | ACC + HS | Research |
| Fruin, 2004 | AMBULATION VIGOROUS | 0.51 | 0.17 | 0.03 | SWA | ACC + HS | Research |
| Fruin, 2004 | BIKE EARLY | -0.50 | 0.23 | 0.05 | SWA | ACC + HS | Research |
| Fruin, 2004 | BIKE LATE | -0.05 | 0.21 | 0.05 | SWA | ACC + HS | Research |
| Fruin, 2004 | BIKE MIDDLE | -0.27 | 0.22 | 0.05 | SWA | ACC + HS | Research |
| Furlanetto, 2010 | AMBULATION LIGHT | -0.19 | 0.13 | 0.02 | SWA | ACC + HS | Research |
| Furlanetto, 2010 | AMBULATION MODERATE | -0.04 | 0.13 | 0.02 | SWA | ACC + HS | Research |
| Furlanetto, 2010 | AMBULATION VIGOROUS | -0.11 | 0.13 | 0.02 | SWA | ACC + HS | Research |
| Gastin, 2017 | AEE 1 | -1.71 | 0.22 | 0.05 | SWA | ACC + HS | Research |
| Gastin, 2017 | AEE 2 | -1.83 | 0.23 | 0.05 | SWA | ACC + HS | Research |
| Gastin, 2017 | AEE 3 | -1.61 | 0.22 | 0.05 | SWA | ACC + HS | Research |
| Gastin, 2017 | AMBULATION | 2.87 | 0.33 | 0.11 | SWA | ACC + HS | Research |
| Gastin, 2017 | RUN LIGHT | 1.06 | 0.18 | 0.03 | SWA | ACC + HS | Research |
| Gastin, 2017 | RUN MODERATE | -0.68 | 0.16 | 0.02 | SWA | ACC + HS | Research |
| Heiermann, 2011 | REST | 0.76 | 0.13 | 0.02 | SWA p2 | ACC + HS | Research |
| Imboden, 2017 | AEE | -0.65 | 0.12 | 0.02 | FF | ACC | Commercial |
| Imboden, 2017 | AEE | -1.30 | 0.15 | 0.02 | JU24 | ACC | Commercial |
| Jakicic, 2004 | AEE | 2.43 | 0.25 | 0.06 | SWA | ACC + HS | Research |
| Jakicic, 2004 | AEE 1 | 0.90 | 0.14 | 0.02 | SWA | ACC + HS | Research |
| Jakicic, 2004 | AMBULATION MODERATE | 1.92 | 0.22 | 0.05 | SWA | ACC + HS | Research |
| Jakicic, 2004 | AMBULATION UPHILL MODERATE | -0.31 | 0.13 | 0.02 | SWA | ACC + HS | Research |
| Jakicic, 2004 | AMBULATION UPHILL VIGOROUS | -1.58 | 0.20 | 0.04 | SWA | ACC + HS | Research |
| Jakicic, 2004 | BIKE LIGHT | -0.41 | 0.14 | 0.02 | SWA | ACC + HS | Research |
| Jakicic, 2004 | BIKE MODERATE | -2.28 | 0.27 | 0.07 | SWA | ACC + HS | Research |
| Jakicic, 2004 | STAIRS LIGHT | -0.18 | 0.14 | 0.02 | SWA | ACC + HS | Research |
| Jakicic, 2004 | STAIRS MODERATE | -1.46 | 0.20 | 0.04 | SWA | ACC + HS | Research |
| Johannsen, 2010 | TEE | -0.20 | 0.12 | 0.01 | SWA p3 | ACC + HS | Research |
| Johannsen, 2010 | TEE | -0.04 | 0.12 | 0.01 | SWAM | ACC + HS | Research |
| Kim, 2015 | AEE LIGHT | 0.16 | 0.10 | 0.01 | BMC | ACC + HS | Research |
| Kim, 2015 | AEE MODERATE | -0.09 | 0.10 | 0.01 | BMC | ACC + HS | Research |
| Kim, 2015 | AEE VIGOROUS | 0.29 | 0.10 | 0.01 | BMC | ACC + HS | Research |
| Kim, 2015 | SEDENTARY | 0.30 | 0.09 | 0.01 | BMC | ACC + HS | Research |
| King, 2004 | AMBULATION LIGHT M | 4.46 | 0.78 | 0.60 | SWA | ACC + HS | Research |
| King, 2004 | AMBULATION M | 1.56 | 0.34 | 0.11 | SWA | ACC + HS | Research |
| King, 2004 | AMBULATION MODERATE F | 1.94 | 0.37 | 0.14 | SWA | ACC + HS | Research |
| King, 2004 | AMBULATION MODERATE M | 3.76 | 0.66 | 0.44 | SWA | ACC + HS | Research |
| King, 2004 | AMBULATION VIGOROUS F | 2.05 | 0.39 | 0.15 | SWA | ACC + HS | Research |
| King, 2004 | AMBULETION F | 0.72 | 0.24 | 0.06 | SWA | ACC + HS | Research |
| King, 2004 | RUN LIGHT F | 2.20 | 0.45 | 0.20 | SWA | ACC + HS | Research |
| King, 2004 | RUN LIGHT M | 2.73 | 0.56 | 0.31 | SWA | ACC + HS | Research |
| King, 2004 | RUN MODERATE F | 1.77 | 0.39 | 0.15 | SWA | ACC + HS | Research |
| King, 2004 | RUN MODERATE M | 1.69 | 0.39 | 0.15 | SWA | ACC + HS | Research |
| King, 2004 | RUN VERY VIGOROUS F | 0.71 | 0.26 | 0.07 | SWA | ACC + HS | Research |
| King, 2004 | RUN VERY VIGOROUS M | 0.69 | 0.27 | 0.07 | SWA | ACC + HS | Research |
| King, 2004 | RUN VIGOROUS F | 1.32 | 0.33 | 0.11 | SWA | ACC + HS | Research |
| King, 2004 | RUN VIGOROUS M | 0.48 | 0.25 | 0.06 | SWA | ACC + HS | Research |
| Koehler, 2011 | TEE | -0.06 | 0.17 | 0.03 | SWA p3 | ACC + HS | Research |
| Lee, 2011 | AMBULATION LIGHT | -0.74 | 0.20 | 0.04 | EPUL | ACC + HR | Commercial |
| Lee, 2011 | AMBULATION MODERATE | 0.04 | 0.18 | 0.03 | EPUL | ACC + HR | Commercial |
| Lee, 2011 | RUN LIGHT | 0.01 | 0.18 | 0.03 | EPUL | ACC + HR | Commercial |
| Lee, 2011 | RUN MODERATE | 0.12 | 0.18 | 0.03 | EPUL | ACC + HR | Commercial |
| Lee, 2011 | SEDENTARY | -0.31 | 0.18 | 0.03 | EPUL | ACC + HR | Commercial |
| Lee, 2014 | AEE | -1.37 | 0.18 | 0.03 | BB1 | ACC + HR + HS | Commercial |
| Lee, 2014 | AEE | -0.28 | 0.10 | 0.01 | BMC | ACC + HS | Research |
| Lee, 2014 | AEE | -0.34 | 0.08 | 0.01 | JU | ACC | Commercial |
| Lee, 2014 | AEE | -0.10 | 0.09 | 0.01 | NF | ACC | Commercial |
| Mackey, 2011 | TEE | 0.05 | 0.15 | 0.02 | SWA | ACC + HS | Research |
| Mackey, 2011 | TEE 6 | -0.06 | 0.15 | 0.02 | SWA | ACC + HS | Research |
| Martien, 2015 | AEE | -0.25 | 0.11 | 0.01 | SWAM | ACC + HS | Research |
| Martien, 2015 | SEDENTARY | -0.99 | 0.11 | 0.01 | SWAM | ACC + HS | Research |
| McMinn, 2013 | AMBULATION LIGHT | -1.55 | 0.25 | 0.06 | AGT3X | ACC | Research |
| McMinn, 2013 | AMBULATION MODERATE | 0.04 | 0.16 | 0.03 | AGT3X | ACC | Research |
| McMinn, 2013 | AMBULATION VIGOROUS | 0.48 | 0.17 | 0.03 | AGT3X | ACC | Research |
| Melanson, 2009 | TEE | -0.05 | 0.35 | 0.12 | LC | ACC + HS | Commercial |
| Mikulic, 2011 | AEE | -1.95 | 0.28 | 0.08 | SWA p3 | ACC + HS | Research |
| Montoye, 2017 | AMBULATION LIGHT | 0.23 | 0.12 | 0.02 | FCHR | ACC + HR | Commercial |
| Montoye, 2017 | AMBULATION MODERATE | 0.22 | 0.12 | 0.02 | FCHR | ACC + HR | Commercial |
| Montoye, 2017 | AMBULATION UPHILL | 0.42 | 0.13 | 0.02 | FCHR | ACC + HR | Commercial |
| Montoye, 2017 | AMBULATION UPHILL LIGHT | 0.45 | 0.13 | 0.02 | FCHR | ACC + HR | Commercial |
| Montoye, 2017 | AMBULATION UPHILL MODERATE | 0.47 | 0.13 | 0.02 | FCHR | ACC + HR | Commercial |
| Montoye, 2017 | AMBULATION VIGOROUS | 0.36 | 0.13 | 0.02 | FCHR | ACC + HR | Commercial |
| Montoye, 2017 | BIKE | 0.43 | 0.18 | 0.03 | FCHR | ACC + HR | Commercial |
| Montoye, 2017 | RUN | 0.52 | 0.15 | 0.02 | FCHR | ACC + HR | Commercial |
| Montoye, 2017 | SITTING | 0.06 | 0.19 | 0.04 | FCHR | ACC + HR | Commercial |
| Montoye, 2017 | STAND | 0.00 | 0.19 | 0.04 | FCHR | ACC + HR | Commercial |
| Montoye, 2017 | SUPINE | -0.23 | 0.19 | 0.04 | FCHR | ACC + HR | Commercial |
| Murakami, 2016 | TEE | -0.68 | 0.19 | 0.04 | EP | ACC + HR | Commercial |
| Murakami, 2016 | TEE MC | 0.12 | 0.17 | 0.03 | EP | ACC + HR | Commercial |
| Murakami, 2016 | TEE | -0.48 | 0.15 | 0.02 | FF | ACC | Commercial |
| Murakami, 2016 | TEE MC | 0.38 | 0.11 | 0.01 | FF | ACC | Commercial |
| Murakami, 2016 | TEE | -1.62 | 0.30 | 0.09 | GVF | ACC | Commercial |
| Murakami, 2016 | TEE MC | -0.83 | 0.23 | 0.05 | GVF | ACC | Commercial |
| Murakami, 2016 | TEE | -1.96 | 0.30 | 0.09 | JU24 | ACC | Commercial |
| Murakami, 2016 | TEE MC | -0.95 | 0.21 | 0.04 | JU24 | ACC | Commercial |
| Murakami, 2016 | TEE | -0.68 | 0.27 | 0.07 | MS | ACC | Commercial |
| Murakami, 2016 | TEE MC | 0.40 | 0.25 | 0.06 | MS | ACC | Commercial |
| Murakami, 2016 | TEE | -1.68 | 0.23 | 0.05 | WPO | ACC | Commercial |
| Murakami, 2016 | TEE MC | -0.93 | 0.18 | 0.03 | WPO | ACC | Commercial |
| Nelson, 2016 | AMBULATION | 0.92 | 0.14 | 0.02 | FF | ACC | Commercial |
| Nelson, 2016 | HOUSEHOLD | -0.27 | 0.14 | 0.02 | FF | ACC | Commercial |
| Nelson, 2016 | SEDENTARY | -0.33 | 0.14 | 0.02 | FF | ACC | Commercial |
| Nelson, 2016 | AMBULATION | 0.48 | 0.12 | 0.01 | JU | ACC | Commercial |
| Nelson, 2016 | HOUSEHOLD | -1.30 | 0.24 | 0.06 | JU | ACC | Commercial |
| Nelson, 2016 | SEDENTARY | -0.39 | 0.18 | 0.03 | JU | ACC | Commercial |
| Papazoglou, 2006 | AMBULATION | 0.82 | 0.19 | 0.04 | SWA p2 | ACC + HS | Research |
| Papazoglou, 2006 | BIKE | 0.54 | 0.17 | 0.03 | SWA p2 | ACC + HS | Research |
| Papazoglou, 2006 | STAIRS | 0.88 | 0.17 | 0.03 | SWA p2 | ACC + HS | Research |
| Price, 2017 | AMBULATION | -1.15 | 0.29 | 0.09 | GVF | ACC | Commercial |
| Price, 2017 | RUN | -0.50 | 0.31 | 0.09 | GVF | ACC | Commercial |
| Price, 2017 | AMBULATION | -0.12 | 0.16 | 0.03 | JU | ACC | Commercial |
| Price, 2017 | RUN | 0.48 | 0.19 | 0.04 | JU | ACC | Commercial |
| Reece, 2015 | AMBULATION | 0.40 | 0.16 | 0.03 | SWAM | ACC + HS | Research |
| Reece, 2015 | COMPUTER | -1.22 | 0.19 | 0.04 | SWAM | ACC + HS | Research |
| Reece, 2015 | SEDENTARY | 0.20 | 0.14 | 0.02 | SWAM | ACC + HS | Research |
| Reece, 2015 | SITTING | 0.19 | 0.14 | 0.02 | SWAM | ACC + HS | Research |
| Reece, 2015 | STAND | -0.58 | 0.15 | 0.02 | SWAM | ACC + HS | Research |
| Reece, 2015 | STAND COMPUTER | -1.10 | 0.18 | 0.03 | SWAM | ACC + HS | Research |
| Rousset, 2015 | TEE CC | -0.49 | 0.10 | 0.01 | SWA p3 | ACC + HS | Research |
| Rousset, 2015 | TEE DLW | -0.05 | 0.10 | 0.01 | SWA p3 | ACC + HS | Research |
| Ryan, 2013 | AMBULATION | 0.82 | 0.17 | 0.03 | SWA p2 | ACC + HS | Research |
| Ryan, 2013 | AMBULATION MODERATE | -0.08 | 0.14 | 0.02 | SWA p2 | ACC + HS | Research |
| Ryan, 2013 | AMBULATION UPHILL MODERATE | -2.27 | 0.27 | 0.08 | SWA p2 | ACC + HS | Research |
| Ryan, 2013 | RUN | -0.38 | 0.15 | 0.02 | SWA p2 | ACC + HS | Research |
| Ryan, 2013 | SEDENTARY | 0.65 | 0.14 | 0.02 | SWA p2 | ACC + HS | Research |
| Slinde, 2013 | TEE | 0.20 | 0.09 | 0.01 | SWA p2 | ACC + HS | Research |
| Slinde, 2013 | TEE 6 | -0.67 | 0.09 | 0.01 | SWA p2 | ACC + HS | Research |
| Smith, 2012 | AMBULATION | 1.29 | 0.18 | 0.03 | SWAM | ACC + HS | Research |
| Smith, 2012 | AMBULATION 2 | 1.96 | 0.23 | 0.05 | SWAM | ACC + HS | Research |
| Smith, 2012 | AMBULATION LIGHT | 1.43 | 0.19 | 0.04 | SWAM | ACC + HS | Research |
| Smith, 2012 | AMBULATION LIGHT 2 | 1.77 | 0.22 | 0.05 | SWAM | ACC + HS | Research |
| Smith, 2012 | AMBULATION MODERATE | 1.57 | 0.20 | 0.04 | SWAM | ACC + HS | Research |
| Smith, 2012 | AMBULATION MODERATE 2 | 1.43 | 0.19 | 0.04 | SWAM | ACC + HS | Research |
| Smith, 2012 | AMBULATION UPHILL MODERATE | -0.16 | 0.13 | 0.02 | SWAM | ACC + HS | Research |
| Smith, 2012 | AMBULATION UPHILL MODERATE 2 | -0.22 | 0.13 | 0.02 | SWAM | ACC + HS | Research |
| Smith, 2012 | COMPUTER | 0.37 | 0.12 | 0.02 | SWAM | ACC + HS | Research |
| Smith, 2012 | HOUSEHOLD | 1.25 | 0.16 | 0.03 | SWAM | ACC + HS | Research |
| Smith, 2012 | HOUSEHOLD 2 | 1.78 | 0.20 | 0.04 | SWAM | ACC + HS | Research |
| Smith, 2012 | SEDENTARY 2 | 0.36 | 0.12 | 0.02 | SWAM | ACC + HS | Research |
| Smith, 2012 | SWEEP | 0.52 | 0.13 | 0.02 | SWAM | ACC + HS | Research |
| Smith, 2012 | SWEEP 2 | 1.50 | 0.18 | 0.03 | SWAM | ACC + HS | Research |
| Stackpool, 2015 | AEE | -0.77 | 0.18 | 0.03 | BMC | ACC + HS | Research |
| Stackpool, 2015 | AEE 1 | -1.29 | 0.22 | 0.05 | BMC | ACC + HS | Research |
| Stackpool, 2015 | AMBULATION | 0.16 | 0.17 | 0.03 | BMC | ACC + HS | Research |
| Stackpool, 2015 | RUN | -0.65 | 0.18 | 0.03 | BMC | ACC + HS | Research |
| Stackpool, 2015 | AEE | -1.15 | 0.17 | 0.03 | JU | ACC | Commercial |
| Stackpool, 2015 | AEE 1 | 0.00 | 0.13 | 0.02 | JU | ACC | Commercial |
| Stackpool, 2015 | AMBULATION | 0.56 | 0.15 | 0.02 | JU | ACC | Commercial |
| Stackpool, 2015 | RUN | 0.77 | 0.19 | 0.03 | JU | ACC | Commercial |
| Stackpool, 2015 | AEE | -0.63 | 0.16 | 0.03 | NF | ACC | Commercial |
| Stackpool, 2015 | AEE 1 | -1.14 | 0.19 | 0.04 | NF | ACC | Commercial |
| Stackpool, 2015 | AMBULATION | -0.08 | 0.15 | 0.02 | NF | ACC | Commercial |
| Stackpool, 2015 | RUN | 0.63 | 0.17 | 0.03 | NF | ACC | Commercial |
| St-Onge, 2007 | TEE | 0.27 | 0.10 | 0.01 | SWA | ACC + HS | Research |
| Tucker, 2015 | AEE | 0.04 | 0.13 | 0.02 | NF | ACC | Commercial |
| Tucker, 2015 | AEE | -0.08 | 0.15 | 0.02 | SWA | ACC + HS | Research |
| Van Helst, 2012 | AMBULATION | -1.42 | 0.20 | 0.04 | V | ACC | Commercial |
| Van Helst, 2012 | RUN MODERATE | -0.22 | 0.14 | 0.02 | V | ACC | Commercial |
| Van Helst, 2012 | RUN VIGOROUS | -0.23 | 0.14 | 0.02 | V | ACC | Commercial |
| Van Helst, 2012 | SEDENTARY | 0.00 | 0.14 | 0.02 | V | ACC | Commercial |
| Van Hoye, 2014 | AMBULATION F | 0.14 | 0.16 | 0.03 | SWA p3 | ACC + HS | Research |
| Van Hoye, 2014 | AMBULATION LIGHT F | -0.52 | 0.17 | 0.03 | SWA p3 | ACC + HS | Research |
| Van Hoye, 2014 | AMBULATION LIGHT M | -1.06 | 0.19 | 0.04 | SWA p3 | ACC + HS | Research |
| Van Hoye, 2014 | AMBULATION M | -0.08 | 0.15 | 0.02 | SWA p3 | ACC + HS | Research |
| Van Hoye, 2014 | AMBULATION MODERATE F | -0.47 | 0.17 | 0.03 | SWA p3 | ACC + HS | Research |
| Van Hoye, 2014 | AMBULATION MODERATE M | -1.13 | 0.20 | 0.04 | SWA p3 | ACC + HS | Research |
| Van Hoye, 2014 | AMBULATION VIGOROUS F | -0.62 | 0.18 | 0.03 | SWA p3 | ACC + HS | Research |
| Van Hoye, 2014 | AMBULATION VIGOROUS M | -1.16 | 0.20 | 0.04 | SWA p3 | ACC + HS | Research |
| Van Hoye, 2014 | RUN LIGHT F | -1.30 | 0.22 | 0.05 | SWA p3 | ACC + HS | Research |
| Van Hoye, 2014 | RUN LIGHT M | -1.35 | 0.21 | 0.04 | SWA p3 | ACC + HS | Research |
| Van Hoye, 2014 | RUN MODERATE F | -1.88 | 0.28 | 0.08 | SWA p3 | ACC + HS | Research |
| Van Hoye, 2014 | RUN MODERATE M | -2.02 | 0.26 | 0.07 | SWA p3 | ACC + HS | Research |
| Van Hoye, 2014 | RUN VERY LIGHT F | -0.76 | 0.18 | 0.03 | SWA p3 | ACC + HS | Research |
| Van Hoye, 2014 | RUN VERY LIGHTM | -0.93 | 0.18 | 0.03 | SWA p3 | ACC + HS | Research |
| Van Hoye, 2014 | RUN VERY VIGOROUS M | -3.08 | 0.41 | 0.17 | SWA p3 | ACC + HS | Research |
| Van Hoye, 2014 | RUN VIGOROUS F | -2.24 | 0.33 | 0.11 | SWA p3 | ACC + HS | Research |
| Van Hoye, 2014 | RUN VIGOROUS M | -3.03 | 0.36 | 0.13 | SWA p3 | ACC + HS | Research |
| Van Hoye, 2015 | AMBULATION LIGHT | -0.36 | 0.12 | 0.01 | SWA p3 | ACC + HS | Research |
| Van Hoye, 2015 | AMBULATION MODERATE | -0.28 | 0.12 | 0.01 | SWA p3 | ACC + HS | Research |
| Van Hoye, 2015 | RUN | -1.04 | 0.14 | 0.02 | SWA p3 | ACC + HS | Research |
| Van Hoye, 2015 | RUN MODERATE | -0.77 | 0.13 | 0.02 | SWA p3 | ACC + HS | Research |
| Van Hoye, 2015 | STAND | 0.23 | 0.11 | 0.01 | SWA p3 | ACC + HS | Research |
| Van Hoye, 2015 | STAND 1 | 0.62 | 0.12 | 0.01 | SWA p3 | ACC + HS | Research |
| Vernillo, 2015 | AMBULATION | 0.78 | 0.19 | 0.03 | SWA p3 | ACC + HS | Research |
| Vernillo, 2015 | AMBULATION DOWNHILL LIGHT | 2.01 | 0.29 | 0.08 | SWA p3 | ACC + HS | Research |
| Vernillo, 2015 | AMBULATION DOWNHILL MODERATE | 2.28 | 0.31 | 0.10 | SWA p3 | ACC + HS | Research |
| Vernillo, 2015 | AMBULATION DOWNHILL VIGOROUS | 2.09 | 0.29 | 0.09 | SWA p3 | ACC + HS | Research |
| Vernillo, 2015 | AMBULATION MODERATE | 0.30 | 0.16 | 0.03 | SWA p3 | ACC + HS | Research |
| Vernillo, 2015 | AMBULATION UPHILL VIGOROUS | -2.33 | 0.32 | 0.10 | SWA p3 | ACC + HS | Research |
| Vernillo, 2015 | AMBULATION UPHILL MODERATE | -1.07 | 0.20 | 0.04 | SWA p3 | ACC + HS | Research |
| Vernillo, 2015 | AMBULATION UPHILL VERY VIGOROUS | -2.83 | 0.37 | 0.14 | SWA p3 | ACC + HS | Research |
| Vernillo, 2015 | SEDENTARY | 0.00 | 0.15 | 0.02 | SWA p3 | ACC + HS | Research |
| Vernillo, 2015 | AMBULATION | 0.56 | 0.17 | 0.03 | SWAM | ACC + HS | Research |
| Vernillo, 2015 | AMBULATION DOWNHILL LIGHT | 2.29 | 0.32 | 0.10 | SWAM | ACC + HS | Research |
| Vernillo, 2015 | AMBULATION DOWNHILL MODERATE | 2.28 | 0.31 | 0.10 | SWAM | ACC + HS | Research |
| Vernillo, 2015 | AMBULATION DOWNHILL VIGOROUS | 2.27 | 0.31 | 0.10 | SWAM | ACC + HS | Research |
| Vernillo, 2015 | AMBULATION MODERATE | 0.00 | 0.16 | 0.03 | SWAM | ACC + HS | Research |
| Vernillo, 2015 | AMBULATION UPHILL MODERATE | -1.49 | 0.24 | 0.06 | SWAM | ACC + HS | Research |
| Vernillo, 2015 | AMBULATION UPHILL VERY VIGOROUS | -2.78 | 0.37 | 0.13 | SWAM | ACC + HS | Research |
| Vernillo, 2015 | AMBULATION UPHILL VIGOROUS | -2.46 | 0.33 | 0.11 | SWAM | ACC + HS | Research |
| Vernillo, 2015 | SEDENTARY | 0.00 | 0.15 | 0.02 | SWAM | ACC + HS | Research |
| Wahl, 2017 | AMBULATION | 0.14 | 0.22 | 0.05 | BA | ACC | Commercial |
| Wahl, 2017 | RUN INTERMITTENT | -1.13 | 0.28 | 0.08 | BA | ACC | Commercial |
| Wahl, 2017 | RUN LIGHT | 0.40 | 0.22 | 0.05 | BA | ACC | Commercial |
| Wahl, 2017 | RUN MODERATE | -0.68 | 0.24 | 0.06 | BA | ACC | Commercial |
| Wahl, 2017 | RUN OUTDOOR | -0.83 | 0.34 | 0.12 | BA | ACC | Commercial |
| Wahl, 2017 | RUN VIGOROUS | -0.82 | 0.25 | 0.06 | BA | ACC | Commercial |
| Wahl, 2017 | AMBULATION | 1.12 | 0.28 | 0.08 | FC | ACC | Commercial |
| Wahl, 2017 | RUN INTERMITTENT | 0.00 | 0.21 | 0.05 | FC | ACC | Commercial |
| Wahl, 2017 | RUN LIGHT | 0.58 | 0.23 | 0.05 | FC | ACC | Commercial |
| Wahl, 2017 | RUN MODERATE | 0.37 | 0.22 | 0.05 | FC | ACC | Commercial |
| Wahl, 2017 | RUN OUTDOOR | -0.19 | 0.29 | 0.09 | FC | ACC | Commercial |
| Wahl, 2017 | RUN VIGOROUS | -0.05 | 0.21 | 0.05 | FC | ACC | Commercial |
| Wahl, 2017 | AMBULATION | 0.78 | 0.25 | 0.06 | FCHR | ACC + HR | Commercial |
| Wahl, 2017 | RUN INTERMITTENT | 0.42 | 0.22 | 0.05 | FCHR | ACC + HR | Commercial |
| Wahl, 2017 | RUN LIGHT | 0.11 | 0.22 | 0.05 | FCHR | ACC + HR | Commercial |
| Wahl, 2017 | RUN MODERATE | 0.33 | 0.22 | 0.05 | FCHR | ACC + HR | Commercial |
| Wahl, 2017 | RUN OUTDOOR | -0.35 | 0.30 | 0.09 | FCHR | ACC + HR | Commercial |
| Wahl, 2017 | RUN VIGOROUS | 0.31 | 0.22 | 0.05 | FCHR | ACC + HR | Commercial |
| Wahl, 2017 | AMBULATION | -0.50 | 0.23 | 0.05 | GF920XT | ACC | Commercial |
| Wahl, 2017 | RUN INTERMITTENT | -0.16 | 0.22 | 0.05 | GF920XT | ACC | Commercial |
| Wahl, 2017 | RUN LIGHT | -0.32 | 0.22 | 0.05 | GF920XT | ACC | Commercial |
| Wahl, 2017 | RUN MODERATE | -0.19 | 0.22 | 0.05 | GF920XT | ACC | Commercial |
| Wahl, 2017 | RUN OUTDOOR | -0.47 | 0.31 | 0.09 | GF920XT | ACC | Commercial |
| Wahl, 2017 | RUN VIGOROUS | -0.22 | 0.22 | 0.05 | GF920XT | ACC | Commercial |
| Wahl, 2017 | AMBULATION | -0.16 | 0.22 | 0.05 | GVA | ACC | Commercial |
| Wahl, 2017 | RUN INTERMITTENT | -0.01 | 0.21 | 0.05 | GVA | ACC | Commercial |
| Wahl, 2017 | RUN LIGHT | 0.46 | 0.23 | 0.05 | GVA | ACC | Commercial |
| Wahl, 2017 | RUN MODERATE | 0.95 | 0.26 | 0.07 | GVA | ACC | Commercial |
| Wahl, 2017 | RUN OUTDOOR | -0.25 | 0.29 | 0.09 | GVA | ACC | Commercial |
| Wahl, 2017 | RUN VIGOROUS | 0.15 | 0.22 | 0.05 | GVA | ACC | Commercial |
| Wahl, 2017 | AMBULATION | -0.13 | 0.22 | 0.05 | GVF | ACC | Commercial |
| Wahl, 2017 | RUN INTERMITTENT | -0.50 | 0.23 | 0.05 | GVF | ACC | Commercial |
| Wahl, 2017 | RUN LIGHT | 0.22 | 0.22 | 0.05 | GVF | ACC | Commercial |
| Wahl, 2017 | RUN MODERATE | 0.15 | 0.22 | 0.05 | GVF | ACC | Commercial |
| Wahl, 2017 | RUN OUTDOOR | -0.90 | 0.35 | 0.12 | GVF | ACC | Commercial |
| Wahl, 2017 | RUN VIGOROUS | -0.29 | 0.22 | 0.05 | GVF | ACC | Commercial |
| Wahl, 2017 | AMBULATION | -0.10 | 0.22 | 0.05 | GVS | ACC | Commercial |
| Wahl, 2017 | RUN INTERMITTENT | 0.03 | 0.21 | 0.05 | GVS | ACC | Commercial |
| Wahl, 2017 | RUN LIGHT | 0.37 | 0.22 | 0.05 | GVS | ACC | Commercial |
| Wahl, 2017 | RUN MODERATE | 0.39 | 0.22 | 0.05 | GVS | ACC | Commercial |
| Wahl, 2017 | RUN OUTDOOR | -0.05 | 0.29 | 0.08 | GVS | ACC | Commercial |
| Wahl, 2017 | RUN VIGOROUS | 0.14 | 0.22 | 0.05 | GVS | ACC | Commercial |
| Wahl, 2017 | AMBULATION | 0.36 | 0.22 | 0.05 | PL | ACC | Commercial |
| Wahl, 2017 | RUN INTERMITTENT | 0.02 | 0.21 | 0.05 | PL | ACC | Commercial |
| Wahl, 2017 | RUN LIGHT | 0.27 | 0.22 | 0.05 | PL | ACC | Commercial |
| Wahl, 2017 | RUN MODERATE | 0.34 | 0.22 | 0.05 | PL | ACC | Commercial |
| Wahl, 2017 | RUN OUTDOOR | 0.15 | 0.22 | 0.05 | PL | ACC | Commercial |
| Wahl, 2017 | RUN VIGOROUS | 0.25 | 0.22 | 0.05 | PL | ACC | Commercial |
| Wahl, 2017 | AMBULATION | -0.11 | 0.22 | 0.05 | SWAM | ACC + HS | Research |
| Wahl, 2017 | RUN INTERMITTENT | -0.43 | 0.23 | 0.05 | SWAM | ACC + HS | Research |
| Wahl, 2017 | RUN LIGHT | -0.10 | 0.22 | 0.05 | SWAM | ACC + HS | Research |
| Wahl, 2017 | RUN MODERATE | -0.59 | 0.23 | 0.05 | SWAM | ACC + HS | Research |
| Wahl, 2017 | RUN OUTDOOR | -0.70 | 0.33 | 0.11 | SWAM | ACC + HS | Research |
| Wahl, 2017 | RUN VIGOROUS | -0.85 | 0.25 | 0.06 | SWAM | ACC + HS | Research |
| Wahl, 2017 | AMBULATION | -1.12 | 0.38 | 0.15 | WPO | ACC | Commercial |
| Wahl, 2017 | RUN INTERMITTENT | -1.86 | 0.51 | 0.26 | WPO | ACC | Commercial |
| Wahl, 2017 | RUN LIGHT | 0.12 | 0.29 | 0.08 | WPO | ACC | Commercial |
| Wahl, 2017 | RUN MODERATE | 0.04 | 0.29 | 0.08 | WPO | ACC | Commercial |
| Wahl, 2017 | RUN OUTDOOR | -0.15 | 0.29 | 0.08 | WPO | ACC | Commercial |
| Wahl, 2017 | RUN VIGOROUS | -0.27 | 0.30 | 0.09 | WPO | ACC | Commercial |
| Wallen 2016 | AEE | -2.44 | 0.27 | 0.07 | AW | ACC + HR | Commercial |
| Wallen 2016 | AEE | -0.80 | 0.16 | 0.03 | FCHR | ACC + HR | Commercial |
| Wallen 2016 | AEE | -1.19 | 0.28 | 0.08 | MA | HR | Commercial |
| Wallen 2016 | AEE | -0.54 | 0.16 | 0.03 | SG | ACC + HR | Commercial |
| Woodman, 2017 | AMBULATION | 2.25 | 0.34 | 0.12 | BP | ACC + HR + HS | Commercial |
| Woodman, 2017 | AMBULATION UPHILL MODERATE | 0.73 | 0.20 | 0.04 | BP | ACC + HR + HS | Commercial |
| Woodman, 2017 | BIKE LIGHT | -0.45 | 0.20 | 0.04 | BP | ACC + HR + HS | Commercial |
| Woodman, 2017 | BIKE MODERATE | -1.01 | 0.23 | 0.05 | BP | ACC + HR + HS | Commercial |
| Woodman, 2017 | COMPUTER | -0.37 | 0.20 | 0.04 | BP | ACC + HR + HS | Commercial |
| Woodman, 2017 | HOUSEHOLD | -0.78 | 0.22 | 0.05 | BP | ACC + HR + HS | Commercial |
| Woodman, 2017 | RUN | 0.20 | 0.16 | 0.03 | BP | ACC + HR + HS | Commercial |
| Woodman, 2017 | SEATED | 0.03 | 0.19 | 0.04 | BP | ACC + HR + HS | Commercial |
| Woodman, 2017 | SEDENTARY | -0.97 | 0.23 | 0.05 | BP | ACC + HR + HS | Commercial |
| Woodman, 2017 | STAIRS | 0.49 | 0.19 | 0.04 | BP | ACC + HR + HS | Commercial |
| Woodman, 2017 | SWEEP | -1.80 | 0.31 | 0.10 | BP | ACC + HR + HS | Commercial |
| Woodman, 2017 | AMBULATION | -1.36 | 0.23 | 0.05 | GVF | ACC | Commercial |
| Woodman, 2017 | AMBULATION UPHILL MODERATE | -2.84 | 0.38 | 0.14 | GVF | ACC | Commercial |
| Woodman, 2017 | BIKE LIGHT | -6.59 | 0.84 | 0.71 | GVF | ACC | Commercial |
| Woodman, 2017 | BIKE MODERATE | -0.80 | 0.19 | 0.04 | GVF | ACC | Commercial |
| Woodman, 2017 | COMPUTER | -0.27 | 0.17 | 0.03 | GVF | ACC | Commercial |
| Woodman, 2017 | HOUSEHOLD | -2.31 | 0.32 | 0.10 | GVF | ACC | Commercial |
| Woodman, 2017 | RUN | -0.98 | 0.28 | 0.08 | GVF | ACC | Commercial |
| Woodman, 2017 | SEATED | -1.21 | 0.22 | 0.05 | GVF | ACC | Commercial |
| Woodman, 2017 | SEDENTARY | -0.32 | 0.17 | 0.03 | GVF | ACC | Commercial |
| Woodman, 2017 | STAIRS | -4.16 | 0.53 | 0.28 | GVF | ACC | Commercial |
| Woodman, 2017 | SWEEP | -2.18 | 0.31 | 0.10 | GVF | ACC | Commercial |
| Woodman, 2017 | AMBULATION | -1.88 | 0.24 | 0.06 | WP | ACC | Commercial |
| Woodman, 2017 | AMBULATION UPHILL MODERATE | -2.80 | 0.32 | 0.10 | WP | ACC | Commercial |
| Woodman, 2017 | BIKE LIGHT | -5.53 | 0.61 | 0.38 | WP | ACC | Commercial |
| Woodman, 2017 | BIKE MODERATE | -2.25 | 0.28 | 0.08 | WP | ACC | Commercial |
| Woodman, 2017 | COMPUTER | 1.94 | 0.25 | 0.06 | WP | ACC | Commercial |
| Woodman, 2017 | HOUSEHOLD | -0.83 | 0.17 | 0.03 | WP | ACC | Commercial |
| Woodman, 2017 | RUN | -2.37 | 0.30 | 0.09 | WP | ACC | Commercial |
| Woodman, 2017 | SEATED | -1.41 | 0.20 | 0.04 | WP | ACC | Commercial |
| Woodman, 2017 | SEDENTARY | -1.05 | 0.18 | 0.03 | WP | ACC | Commercial |
| Woodman, 2017 | STAIRS | -3.47 | 0.39 | 0.15 | WP | ACC | Commercial |
| Woodman, 2017 | SWEEP | -1.76 | 0.23 | 0.05 | WP | ACC | Commercial |

Individual study effect size (Hedges g), standard error (SE), variance and the moderators assigned to each study.
