# Supplementary material
Source: HighWire-hosted journal article supplement (https://bjsm.bmj.com/content/54/6/332)
Supplement: inline-supplementary-material-9 [file inline-supplementary-material-9.docx]

**.** A bar chart detailing percentage of studies fulfilling the criteria for each question in the modified Down’s and Black tool.
